# Supplementary material
Source: PubMed Central journal article supplement (PMC3604719)
Supplement: emboj201324s1.pdf [file emboj201324s1.pdf]

## Supplemental data

**Figure S1. Multiple sequence alignment of the REPULS domains.** Positions where hydrophobic and aromatic characters are particularly conserved are shaded green and orange, respectively. Other striking similarities are in blue and pink (basic and acidic residues, respectively), as well as in yellow (small residues or loop-forming residues). Predicted secondary structures are reported up to the alignment. REPULS domains which were particularly difficult to detect are reported at bottom. UniProt identifiers : *Saccharomyces cerevisiae* ([Q08562](#)), *Candida glabrata* ([Q6FSM2](#)), *Kazachstania africana* ([H2AY18](#)), *Naumovozyma dairensis* ([G0W9C7](#)), *Naumovozyma castelli* ([G0VIR1](#)), *Tetrapisispora phaffii* ([G8BZA4](#)), *Vanderwaltozyma polyspora* ([A7TPE3](#)), *Zygosaccharomyces rouxii* (C5DWI1), *Torulospora delbrueckii* ([G8ZXX1](#)), *Kluyveromyces waltii* (Kwal14.1868 (from YOGB, Byrne and Wolfe 2005)), *Lachancea thermotolerans* ([C5E2Q8](#)), *Kluyveromyces lactis* ([Q6CUF0](#)), *Ashbya gossypii* ([Q75EC7](#)), *Eremothecium cymbalariae* ([G8JR28](#)).

The central region of Uls1 (aa 550 to 900), located after the SIMs and before the Swi2/Snf2-like translocase domain, harbors typical features of globular domains, as deduced from Hydrophobic Cluster Analysis (HCA) (Callebaut et al. 1997). Indeed this region contains ~1/3 of strong hydrophobic amino acids (V I L F M Y W), which are distributed on the HCA two-dimensional plot into hydrophobic clusters, which mainly correspond to the regular secondary structures forming the core of globular domains. Using this Uls1 fragment as query, we searched the sequence databases (non redundant (nr) database at NCBI, 17,919,084 sequences) using PSI-BLAST (Altschul et al. 1997). We deduced from the PSI-BLAST results, obtained at convergence by iteration 3, that Uls1 contains a repeated domain, included between amino acids 677 and 761 (first repeat) and 773 and 855 (second repeat). We named these repeats REPULS after REPEAT in ULS1.

REPULS domains are present in Uls1 sequences from yeasts of the *Saccharomyces* complex, also named *Saccharomycetaceae*. *Saccharomycetaceae* are hemiascomycetes that have HML/HMR-like cassettes, which appear after the split from the *Yarrowia lipolytica* and *Debaromyces hansenii*/*Candida albicans* branch (Génolevures Consortium 2009, Dujon 2010). No REPULS domains could indeed be detected in these last yeast species, belonging to other subdivisions of hemiascomycetes, or in other more distant species. Strict tandem repeats are

observed in Uls1 from *Saccharomyces cerevisiae* to *Zygosaccharomyces rouxii*, whereas *Kluyveromyces waltii* and *Lachancea thermotolerans* Uls1 have only one REPULS domain, and *Kluyveromyces lactis*, *Ashbya gossypii* and *Eremothecium cymbalariae* have multiple copies.

Secondary structure predictions indicate that the REPULS domains are likely made of four alpha-helices. No obvious similarity has been detected with known 3D structures, using sequence similarity searches (see before) or fold recognition programs (*e.g.* Phyre : Bennett-Lovsey et al. 2008). Positions in which the hydrophobic character is conserved (in green) likely participate in the hydrophobic core of the domain. Positions mainly occupied by aromatic amino acids (orange) might play a role either in the packing of the hydrophobic core or in a specific function, at the surface of the domain. REPULS domains contain several conserved basic amino acids and are characterized by a striking sequence signature (G-[LV]-K-M-[PDEN]), located in the loop linking helices C and D. Worth noting is that these sequence features of REPULS domains are well conserved in Uls1 proteins of species containing only two (tandem) or one (single) REPULS domain(s). In species having more than two domains, some of the additional REPULS domains lose some of these sequence characteristics, so that they are difficult to detect. This is particularly the case for the degenerated REPULS repeats D of *Ashbya gossypii* and *Eremothecium cymbalariae* and repeat F of *Kluyveromyces lactis*. The sequence of the repeat D of *Eremothecium cymbalariae* was the only one that could be detected from the PSI-BLAST results. The relationships between the REPULS repeat D of *Ashbya gossypii* and *Eremothecium cymbalariae* and the REPULS repeat F of *Kluyveromyces lactis* were then detected using HCA.

**Figure S2.** Telomere length in cells lacking Uls1, Rif2 and Sir4. Genomic DNA from strains Lev346 (WT), 184-48c (*uls1-Δ*), 183-30d (*rif2-Δ*), Lev575 (*sir4-Δ*), 184-14c (*rif2-Δ sir4-Δ*), 183-10c (*uls1-Δ sir4-Δ*), 183-2d (*uls1-Δ rif2-Δ*) and 183-25a (*uls1-Δ rif2-Δ sir4-Δ*) was digested with XhoI, separated in a 0.9% agarose gel and probed with a Y' distal fragment.

## References

Altschul, S.F., T.L. Madden, A.A. Schaffer, J. Zhang, Z. Zhang, W. Miller and D.J. Lipman, Gapped BLAST and PSI-BLAST: a new generation of protein database search programs.

*Nucleic Acids Res* **25**: 3389-402.

Bennett-Lovsey, R.M., A.D. Herbert, M.J.E. Sternberg and L.A. Kelley. 2008. Exploring the extremes of sequence/structure space with ensemble fold recognition in the program Phyre., *Proteins* **70**: 611-25.

Butler, G., C. Kenny, A. Fagan, C. Kurischko, C. Gaillardin and K.H. Wolfe. 2004. Evolution of the MAT locus and its Ho endonuclease in yeast species. *Proc Natl Acad Sci U S A* **101**: 1632-7.

Byrne, K.P. and K.H. Wolfe. 2005. The Yeast Gene Order Browser: combining curated homology and syntenic context reveals gene fate in polyploidy species. *Genome Res* **15**:1456-61.

Callebaut, I., G. Labesse, P. Durand, A. Poupon, L. Canard, J. Chomilier, B. Henrissat and J.P. Mornon. 1997. Deciphering protein sequence information through hydrophobic cluster analysis (HCA): current status and perspectives. *Cell Mol Life Sci* **53**: 621-45.

Dujon, B. 2010. Yeast evolutionary genomics. *Nat Rev Genet* **11** : 512-24.

Génolevures Consortium, Souciet, J.L., B. Dujon, C. Gaillardin, M. Johnston, P.V. Baret, P. Cliften, D.J. Sherman, J. Weissenbach, E. Westhof, P. Wincker, C. Jubin, J. Poulain, V. Barbe, B. Ségurens, F. Artiguenave, V. Anthouard, B. Vacherie, M.E. Val, R.S. Fulton, P. Minx, R. Wilson, P. Durrens, G. Jean, C. Marck, T. Martin, M. Nikolski, T. Rolland, M.L. Seret, S. Casarégola, L. Despons, C. Fairhead, G. Fischer, I. Lafontaine, V. Leh, M. Lemaire, J. de Montigny, C. Neuvéglise, A. Thierry, I. Blanc-Lenfle, C. Bleykasten, J. Diffels, E. Fritsch, L. Frangeul, A. Goëffon, N. Jauniaux, R. Kachouri-Lafond, C. Payen, S. Potier, L. Pribylova, C. Ozanne, G.F. Richard, C. Sacerdot, M.L. Straub and E. Talla. 2009. Comparative genomics of protoploid Saccharomycetaceae. *Genome Res* **19**:1696-709.

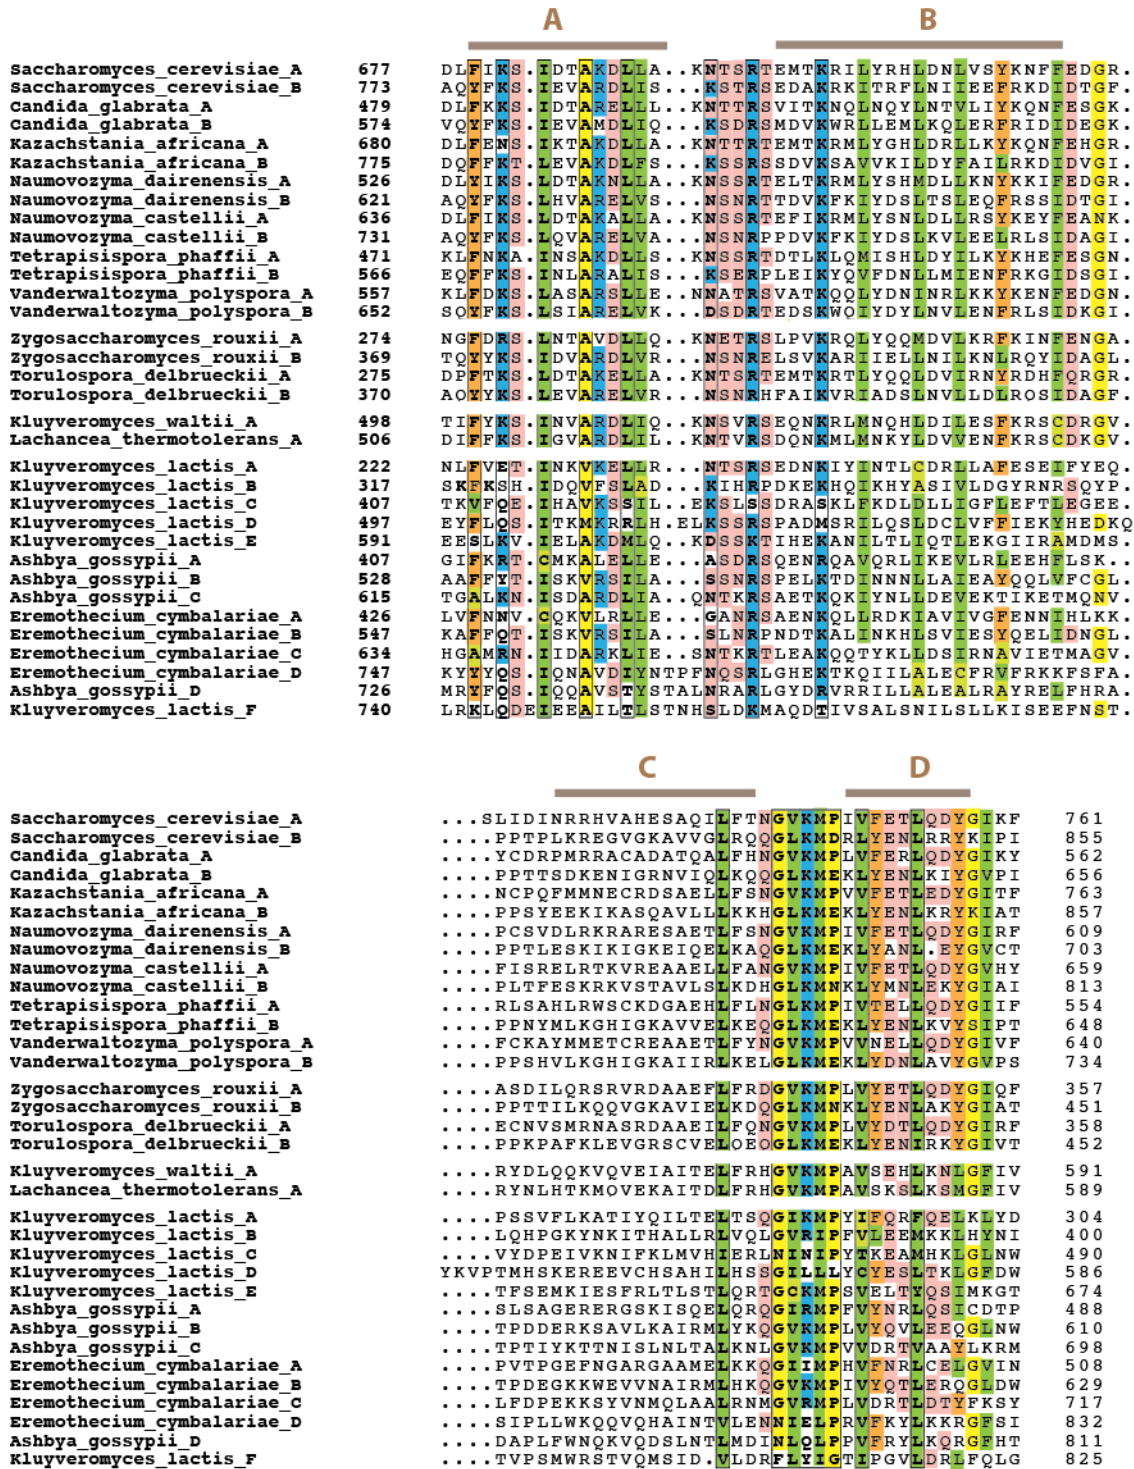

Figure S1

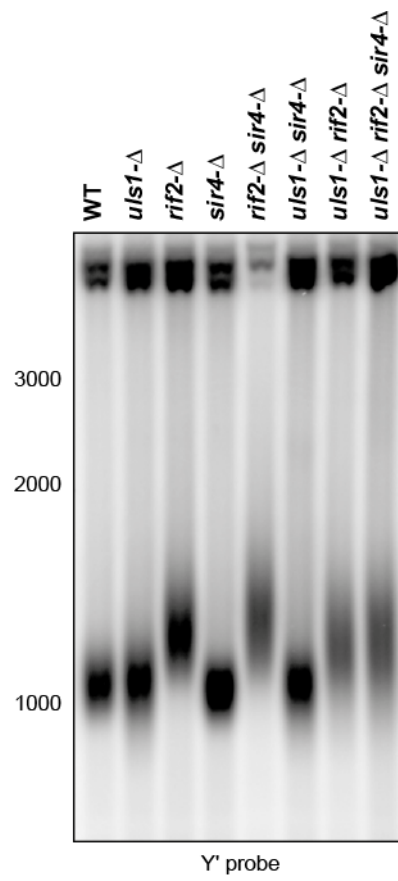

Figure S2

---

**Supplementary table 1. Yeast strains used in this study.** All strains are from the W303-1a background (*ade2-1 trp1-1 ura3-1 leu2-3,112 his3-11,15 can1-100 RAD5*).

---

| Strains | Genotype                                                    |
|---------|-------------------------------------------------------------|
| Lev346  | <i>MATa</i>                                                 |
| RL71    | <i>MATa uls1-Δ::klLEU2</i>                                  |
| 212-12a | <i>MATa hml-Δ::NAT</i>                                      |
| 213-4a  | <i>MATa hml-Δ::NAT</i>                                      |
| 213-7b  | <i>MATa hml-Δ::NAT uls1-Δ::klLEU2</i>                       |
| 213-9c  | <i>MATa hml-Δ::NAT uls1-Δ::klLEU2</i>                       |
| 195-28a | <i>MATa uls1-Δ::klLEU2 lif1-Δ::skHIS3</i>                   |
| 210-3d  | <i>MATa hml-Δ::NAT</i>                                      |
| 211-1a  | <i>MATa hml-Δ::NAT</i>                                      |
| 211-8d  | <i>MATa hml-Δ::NAT uls1-Δ::klLEU2</i>                       |
| 211-10b | <i>MATa hml-Δ::NAT uls1-Δ::klLEU2</i>                       |
| 209-1c  | <i>MATa hml-Δ::NAT pACE1-UBR1 pACE1-ROX1 rap1-(Δ)::KANr</i> |
| 209-2b  | <i>MATa pACE1-UBR1 pACE1-ROX1 rap1-(Δ)::KANr</i>            |
| 206-2b  | <i>MATa hml-Δ::NAT</i>                                      |
| 205-9a  | <i>MATa hml-Δ::NAT</i>                                      |
| 206-1d  | <i>MATa hml-Δ::NAT uls1-Δ::klLEU2</i>                       |
| 205-14c | <i>MATa hml-Δ::NAT uls1-Δ::klLEU2</i>                       |
| 199-3a  | <i>MATalpha lys2::pGAL1-ISCEI uls1-C1333S</i>               |
| 200-2c  | <i>MATalpha uls1-K975R</i>                                  |
| 200-5d  | <i>MATa uls1-K975R</i>                                      |

196-11c *MATalpha bar1-Δ*  
 196-13b *MATalpha bar1-Δ*  
 196-5a *MATalpha bar1-Δ uls1-Δ::klLEU2*  
 196-6a *MATalpha bar1-Δ uls1-Δ::klLEU2*  
 Lev791 *MATalpha bar1-Δ uls1-Δ677-855*  
 Lev792 *MATalpha bar1-Δ uls1-Δ677-855*  
 210-5b *MATa hml-Δ::NAT uls1-Δ::klLEU2*  
 RL179 *MATa bar1-Δ lys2::GAL-ISCEI ISceI-URA3-ISceI*  
 RL183 *MATa bar1-Δ lys2::GAL-ISCEI ISceI-URA3-ISceI uls1-Δ::klLEU2*  
 RL185 *MATa bar1-Δ lys2::GAL-ISCEI ISceI-URA3-ISceI uls1-Δ::klLEU2 smt3-3R::TRP1*  
 RL181 *MATa bar1-Δ lys2::GAL-ISCEI ISceI-URA3-ISceI smt3-3R::TRP1*  
 RL266 *MATa bar1-Δ lys2::GAL-ISCEI ISceI-URA3-ISceI uls1-Δ::klLEU2 siz1-Δ::HPH*  
 RL267 *MATa bar1-Δ lys2::GAL-ISCEI ISceI-URA3-ISceI uls1-Δ::klLEU2 siz2-Δ::NAT*  
 RL268 *MATa bar1-Δ lys2::GAL-ISCEI ISceI-URA3-ISceI siz1-Δ::HPH*  
 RL269 *MATa bar1-Δ lys2::GAL-ISCEI ISceI-URA3-ISceI siz2-Δ::NAT*  
 169-1c *MATa pACE1-UBR1 pACE1-ROX1 rap1-(Δ)::KANr*  
 169-15c *MATa bar1-Δ pACE1-UBR1 pACE1-ROX1 rap1-(Δ)::KANr*  
 169-6b *MATa pACE1-UBR1 pACE1-ROX1 rap1-(Δ)::KANr smt3-3R::TRP1*  
 169-11a *MATa bar1-Δ pACE1-UBR1 pACE1-ROX1 rap1-(Δ)::KANr smt3-3R::TRP1*  
 195-19d *MATalpha*  
 195-3a *MATalpha rap1-Damp::KANr*  
 195-7b *MATalpha uls1-Δ::klLEU2*  
 195-8a *MATalpha rap1-Damp::KANr uls1-Δ::klLEU2*  
 195-6b *MATalpha rap1-Damp::KANr uls1-Δ::klLEU2 lif1-Δ::skHIS3*  
 195-1d *MATalpha rap1-Damp::KANr uls1-Δ::klLEU2 smt3-3R::TRP1*

198-16a *MATa uls1-Δ::klLEU2 rap1-Δ2-228*  
 198-19a *MATa uls1-Δ::klLEU2 rap1-Δ2-228*  
 196-1a *MATalpha bar1-Δ uls1-Δ::klLEU2 rap1-Δ2-309*  
 196-7c *MATalpha bar1-Δ uls1-Δ::klLEU2 rap1-Δ2-309*  
 210-2d *MATa hml-Δ::NAT*  
 210-3d *MATa hml-Δ::NAT*  
 210-5b *MATa hml-Δ::NAT uls1-Δ::klLEU2*  
 210-4c *MATalpha hml-Δ::NAT uls1-Δ::klLEU2*  
 210-10b *MATa hml-Δ::NAT uls1-Δ::klLEU2 rap1-K246R*  
 210-5d *MATalpha hml-Δ::NAT uls1-Δ::klLEU2 rap1-K246R*  
 210-1b *MATa hml-Δ::NAT rap1-K246R*  
 210-7b *MATa hml-Δ::NAT rap1-K246R*  
 212-2d *MATa hml-Δ::NAT*  
 212-10b *MATa hml-Δ::NAT*  
 212-1a *MATalpha hml-Δ::NAT uls1-Δ::klLEU2*  
 212-8a *MATa hml-Δ::NAT uls1-Δ::klLEU2*  
 212-5b *MATalpha hml-Δ::NAT uls1-Δ::klLEU2 rap1-K240R, K246R*  
 212-17d *MATa hml-Δ::NAT uls1-Δ::klLEU2 rap1-K240R, K246R*  
 212-13c *MATa hml-Δ::NAT uls1-Δ::klLEU2 rap1-K240R, K246R*  
 212-3b *MATa hml-Δ::NAT rap1-K240R, K246R*  
 212-4c *MATa hml-Δ::NAT rap1-K240R, K246R*  
 184-48c *MATalpha bar1-Δ hmr-Δ::NAT uls1-Δ::klLEU2*  
 184-9d *MATalpha bar1-Δ hmr-Δ::NAT uls1-Δ::klLEU2*  
 183-30d *MATalpha bar1-Δ hmr-Δ::NAT rif2-Δ::HPH*  
 Lev575 *MATa hml-Δ::NAT sir4-Δ::HPH*



Lev576 *MATalpha hmr-Δ::NAT sir4-Δ::HPH*

184-14c *MATalpha bar1-Δ hmr-Δ::NAT rif2-Δ::HPH sir4-Δ::HPH*

Lev601 *MATa hml-Δ::NAT rif2-Δ::skHIS3 sir4-Δ::HPH*

183-10c *MATalpha bar1-Δ hmr-Δ::NAT uls1-Δ::klLEU2 sir4-Δ::HPH*

183-2d *MATalpha bar1-Δ hmr-Δ::NAT uls1-Δ::klLEU2 rif2-Δ::HPH*

183-25a *MATalpha bar1-Δ hmr-Δ::NAT uls1-Δ::klLEU2 rif2-Δ::HPH sir4-Δ::HPH*

184-49a *MATalpha bar1-Δ hmr-Δ::NAT uls1-Δ::klLEU2 rif2-Δ::HPH sir4-Δ::HPH*

205-9a *MATa hml-Δ::NAT*

205-14c *MATa hml-Δ::NAT uls1-Δ::klLEU2*

212-3c *MATa hml-Δ::NAT uls1-Δ::klLEU2 sir4-Δ::HPH*

212-4b *MATa hml-Δ::NAT uls1-Δ::klLEU2 sir4-Δ::HPH*

205-16a *MATa hml-Δ::NAT uls1-Δ::klLEU2 sir4-Δ::HPH smt3-3R::TRP1*

212-1b *MATa hml-Δ::NAT uls1-Δ::klLEU2 sir4-Δ::HPH rap1-K240R, K246R*

212-2a *MATa hml-Δ::NAT uls1-Δ::klLEU2 sir4-Δ::HPH rap1-K240R, K246R*

207-14d *MATa hml-Δ::NAT uls1-Δ::klLEU2 sir4-Δ::HPH rap1-Δ2-309*

---
